# Supplementary material for: Particle size traces modern Saharan dust transport and deposition across theequatorial North Atlantic
Source: Copernicus journal article supplement (doi:10.5194/acp-16-13697-2016), 2016-11-04
Supplement: Supplementary file 1 [file acp-16-13697-2016-supplement.pdf]

Supplement of Atmos. Chem. Phys., 16, 13697–13710, 2016  
<http://www.atmos-chem-phys.net/16/13697/2016/>  
doi:10.5194/acp-16-13697-2016-supplement  
© Author(s) 2016. CC Attribution 3.0 License.

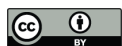

*Supplement of*

## **Particle size traces modern Saharan dust transport and deposition across the equatorial North Atlantic**

**Michèle van der Does et al.**

*Correspondence to:* Michèle van der Does (mdoes@nioz.nl)

The copyright of individual parts of the supplement might differ from the CC-BY 3.0 licence.

Here we provide maps of Chlorophyll A concentrations and Sea Surface Salinity, over the sampled period October 2012 – November 2013, over the equatorial Atlantic Ocean.

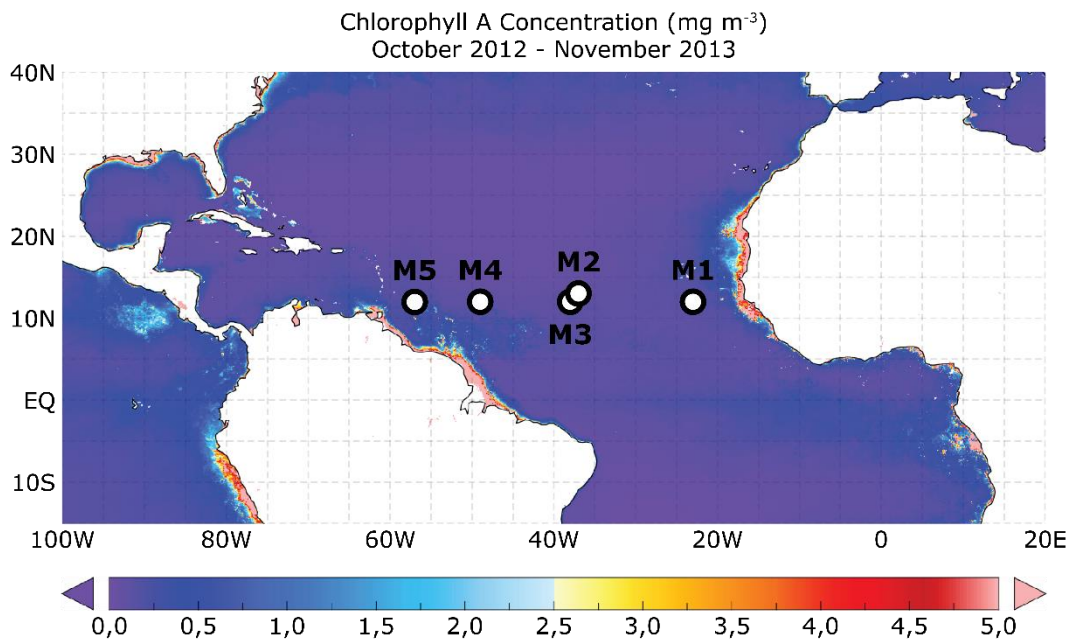

**Figure S1: Average chlorophyll A concentrations over the Atlantic Ocean, from October 2012 to November 2013. Stations M1–M5 are marked with black/white circles. Source: MODIS Aqua, from Giovanni online data system (NASA GES DISC).**

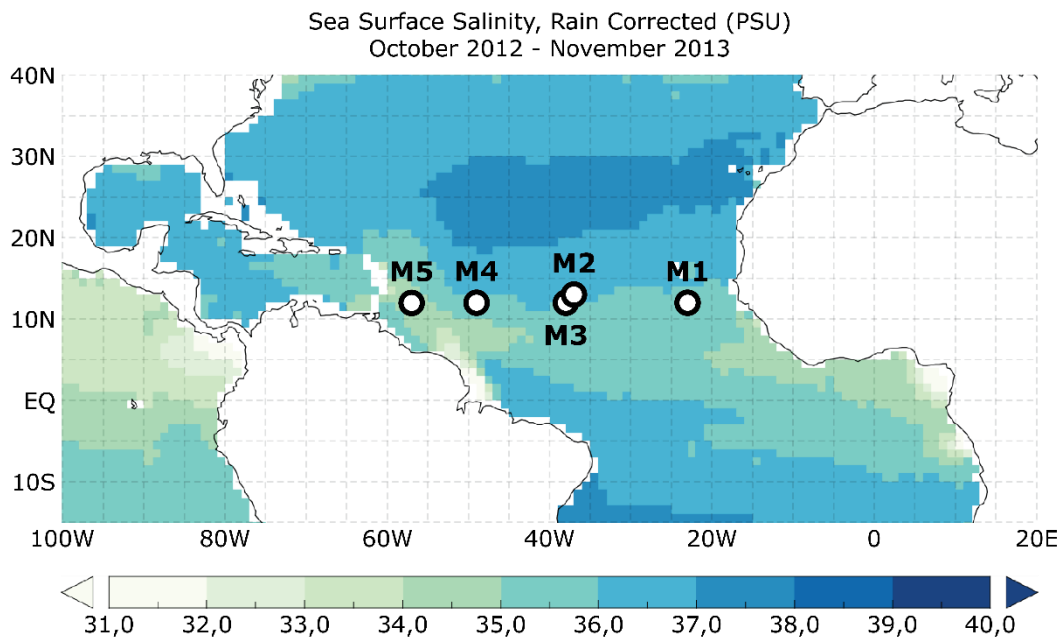

**Figure S2: Average sea surface salinity over the Atlantic Ocean, from October 2012 to November 2013. Stations M1–M5 are marked with black/white circles. Source: Aquarius, from Giovanni online data system (NASA GES DISC).**
